# Supplementary material for: Recovery of coral assemblages despite acute and recurrent disturbances on a South Central Pacific reef
Source: PubMed Central journal article supplement (PMC6018695; doi:10.1038/s41598-018-27891-3), 2018-06-26
Supplement: 41598_2018_27891_MOESM1_ESM.pdf [file 41598_2018_27891_MOESM1_ESM.pdf]

**Recovery of coral assemblages despite acute and recurrent disturbances on a  
South Central Pacific reef**

**Mehdi Adjeroud, Mohsen Kayal, Claudie Iborra-Cantonnet, Julie Vercelloni, Pauline  
Bosslerelle, Vetea Liao, Yannick Chancerelle, Joachim Claudet, Lucie Penin**

**Supplementary Information**

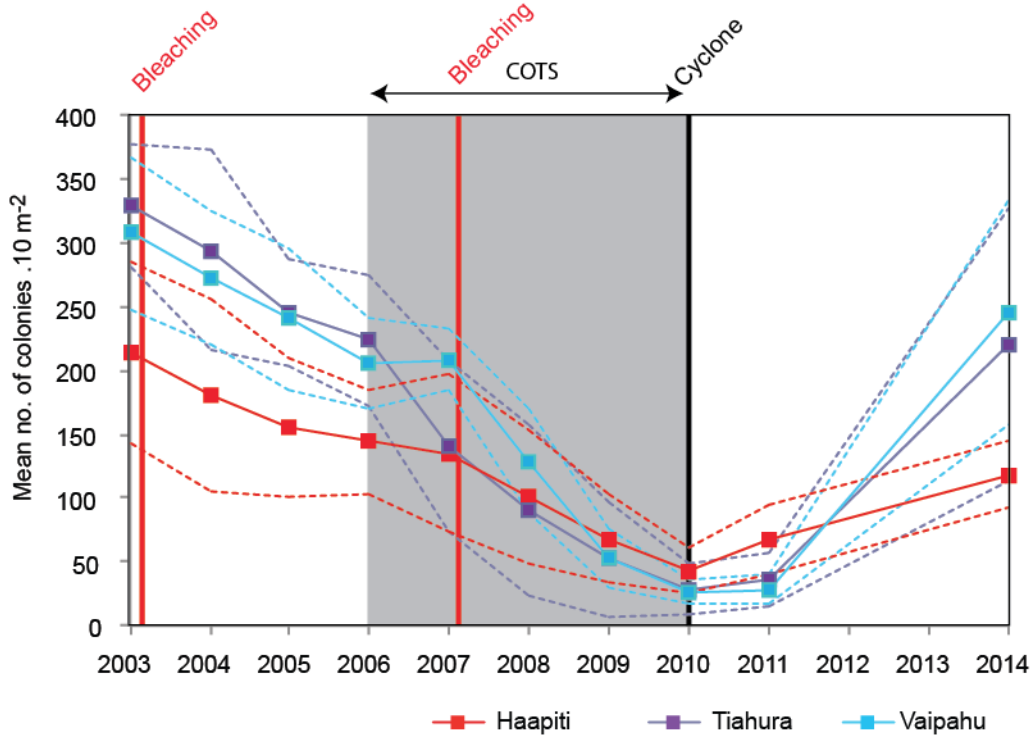

**Figure S1. Temporal dynamics in adult coral abundance (all 19 genera pooled) at the three locations (all three depths pooled at each location) impacted by the four disturbances between 2003 and 2014. Dotted lines represent standard deviation.**

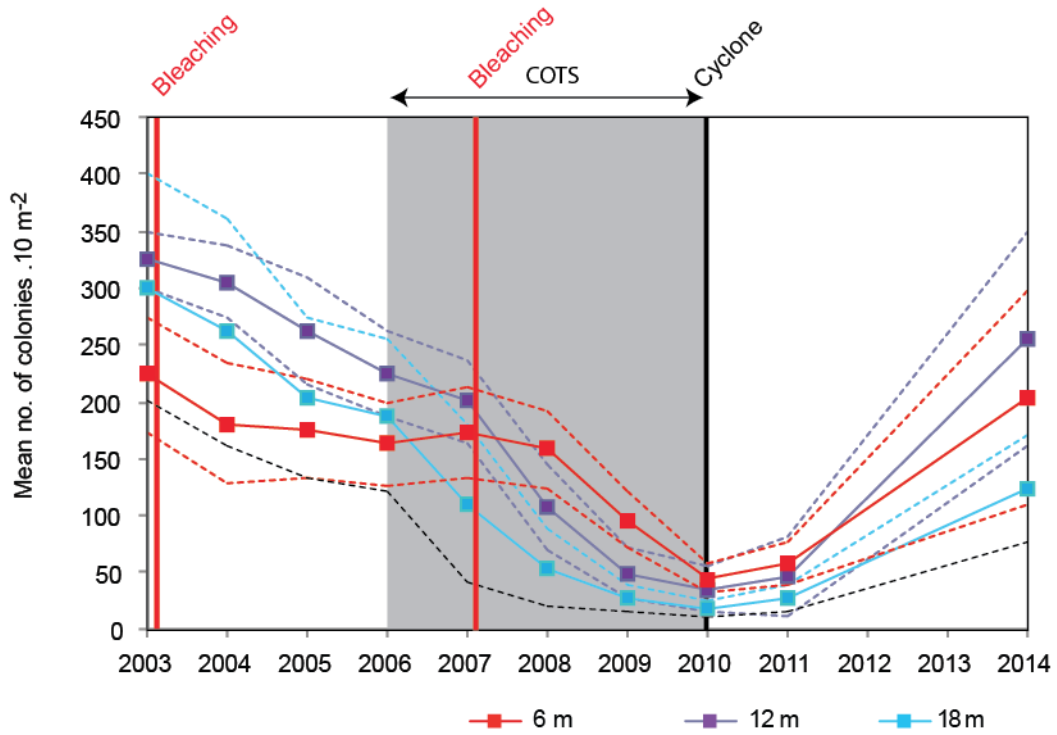

**Figure S2. Temporal dynamics in adult coral abundance (all 19 genera pooled) at the three depths (all three locations pooled for each depth) impacted by the four disturbances between 2003 and 2014. Dotted lines represent standard deviation.**

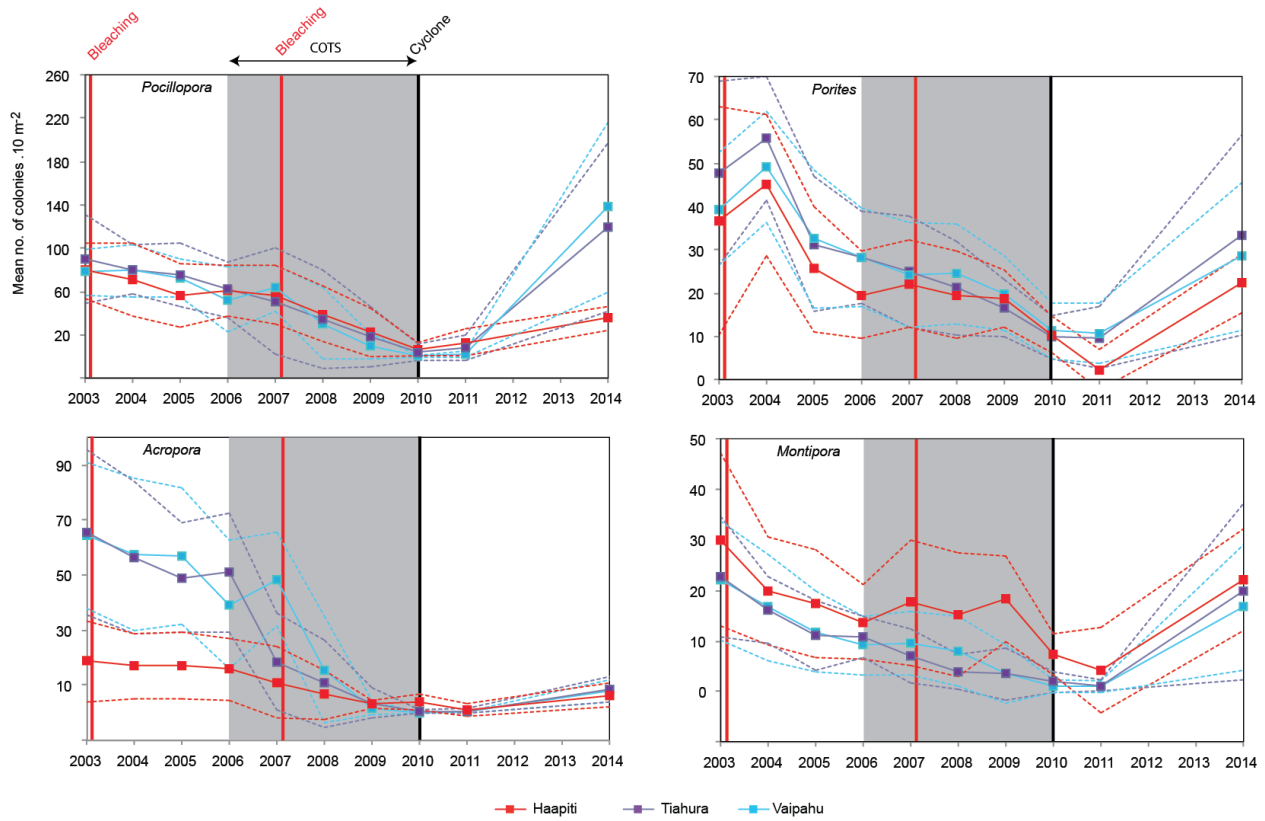

**Figure S3. Temporal dynamics in adult coral abundance of the four dominant genera at the three locations (all three depths pooled at each location) impacted by the four disturbances between 2003 and 2014. Dotted lines represent standard deviation.**

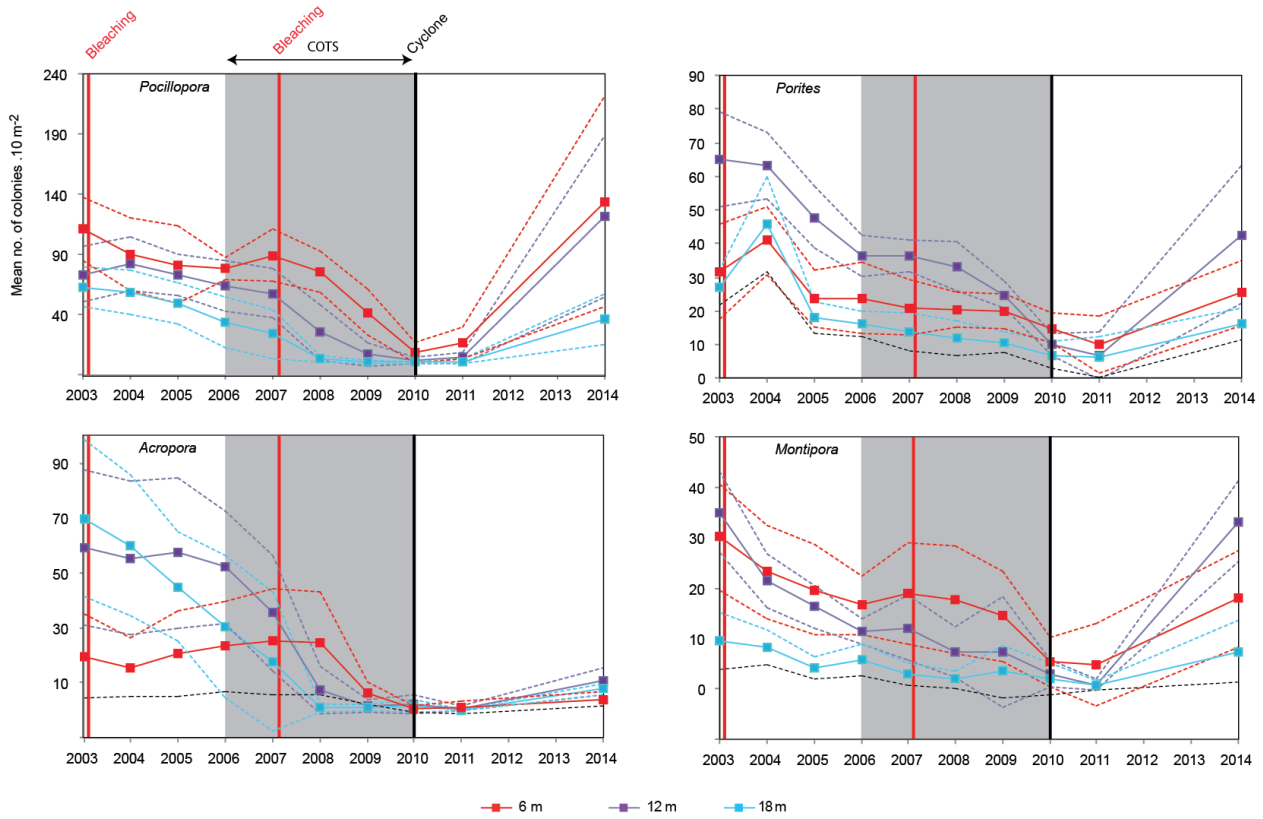

**Figure S4. Temporal dynamics in adult coral abundance of the four dominant genera at the three depths (all three locations pooled for each depth) impacted by the four disturbances between 2003 and 2014. Dotted lines represent standard deviation.**

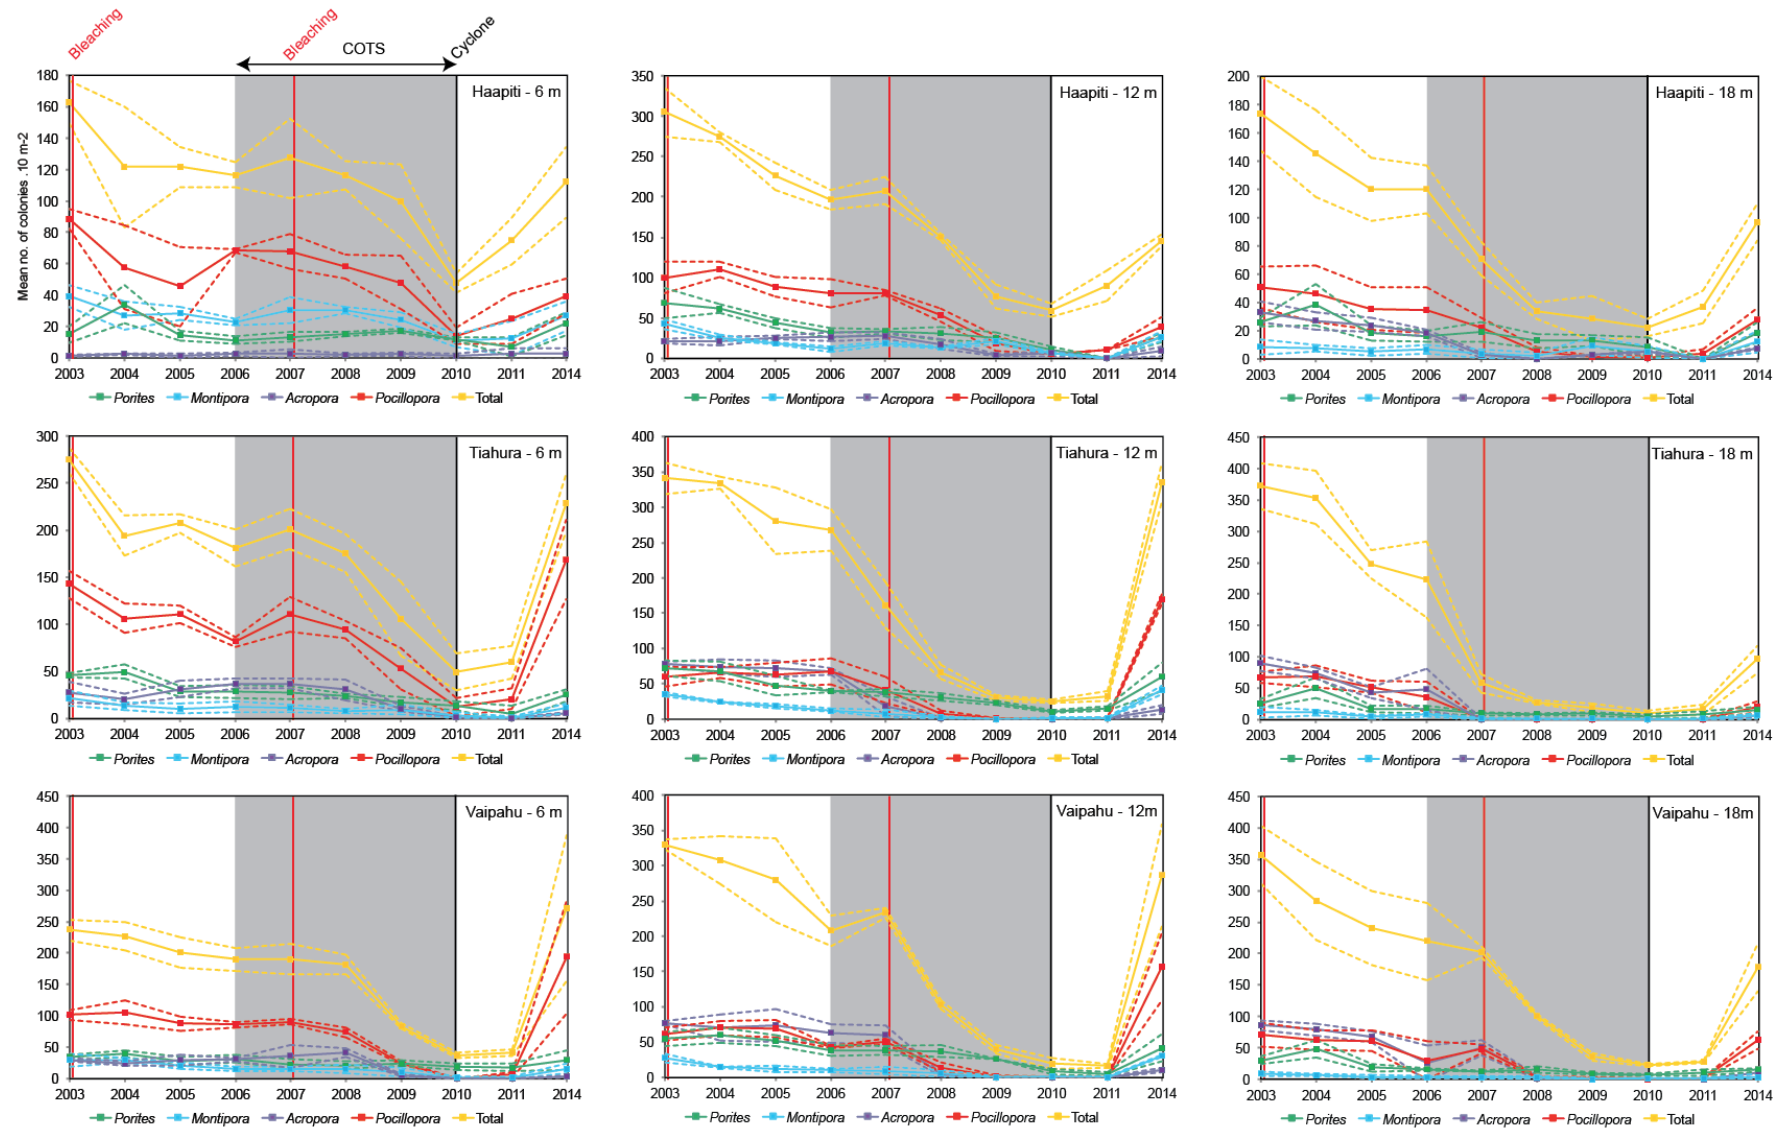

**Figure S5. Temporal dynamics in adult coral abundance of the four dominant genera at the nine stations impacted by the four disturbances between 2003 and 2014. Dotted lines represent standard deviation.**

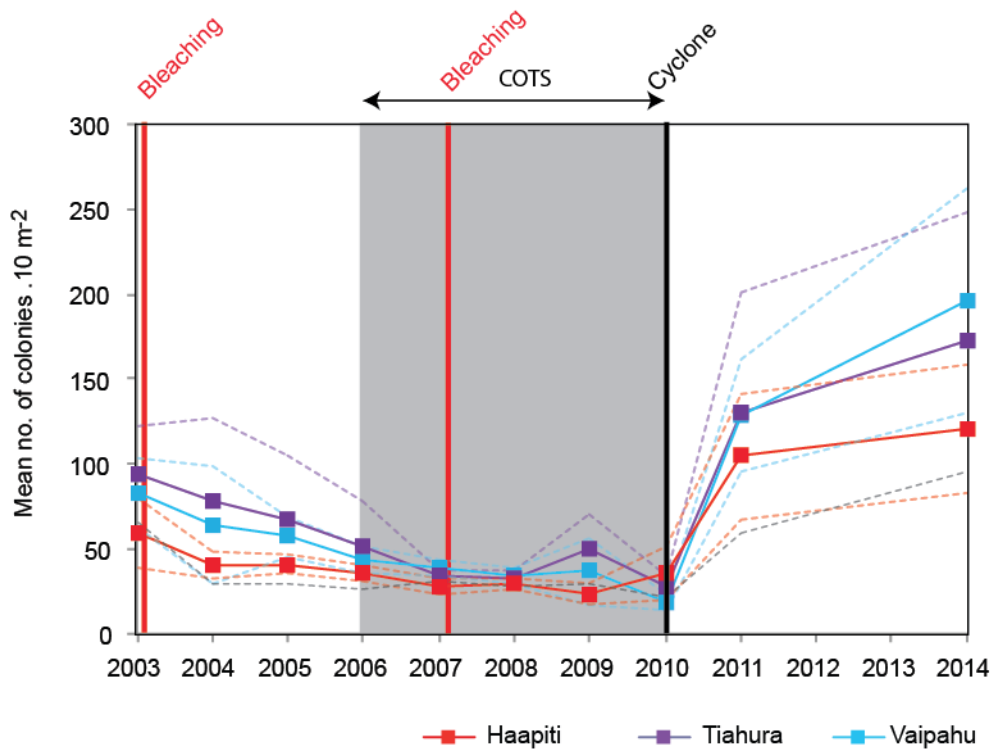

**Figure S6. Temporal dynamics in juvenile coral abundance (all 19 genera pooled) at the three locations (all three depths pooled at each location) impacted by the four disturbances between 2003 and 2014. Dotted lines represent standard deviation.**

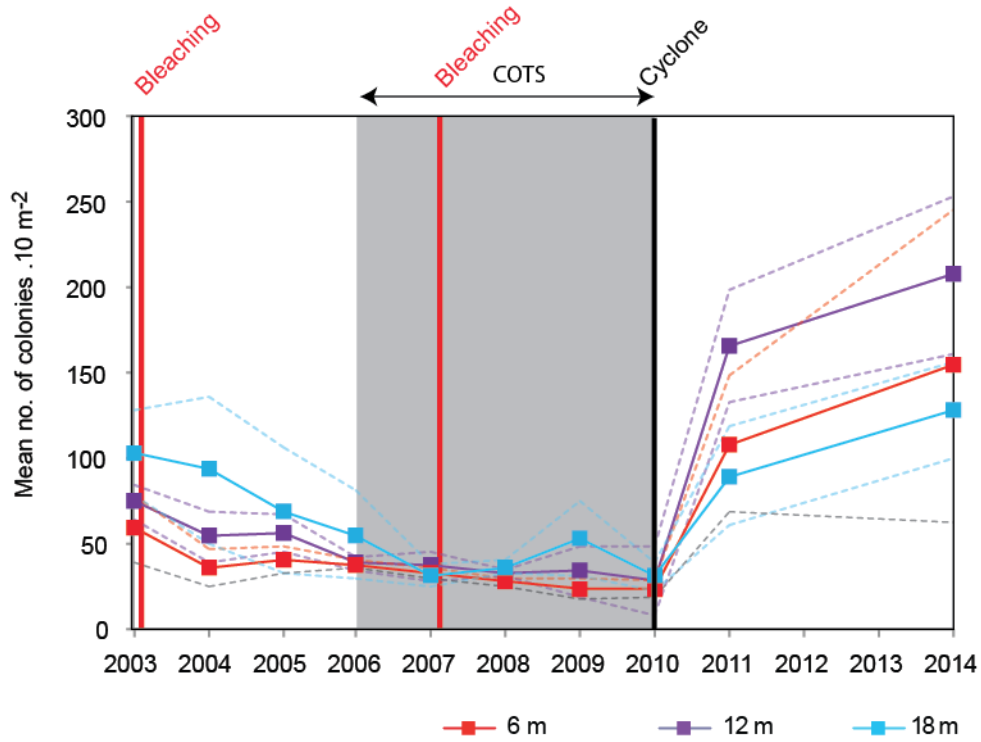

**Figure S7. Temporal dynamics in juvenile coral abundance (all 19 genera pooled) at the three depths (all three locations pooled for each depth) impacted by the four disturbances between 2003 and 2014. Dotted lines represent standard deviation.**



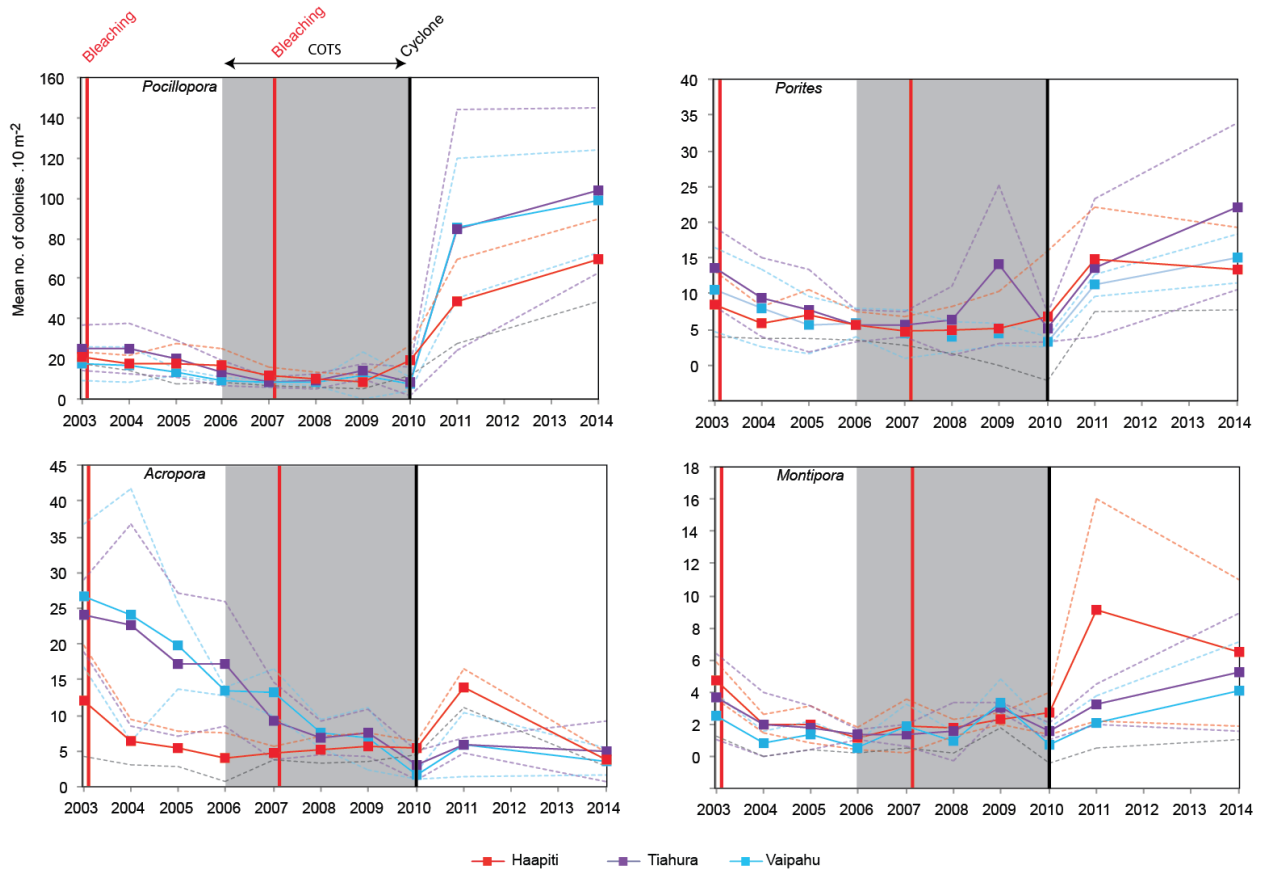

**Figure S8. Temporal dynamics in juvenile coral abundance of the four dominant genera at the three locations (all three depths pooled at each location) impacted by the four disturbances between 2003 and 2014. Dotted lines represent standard deviation.**

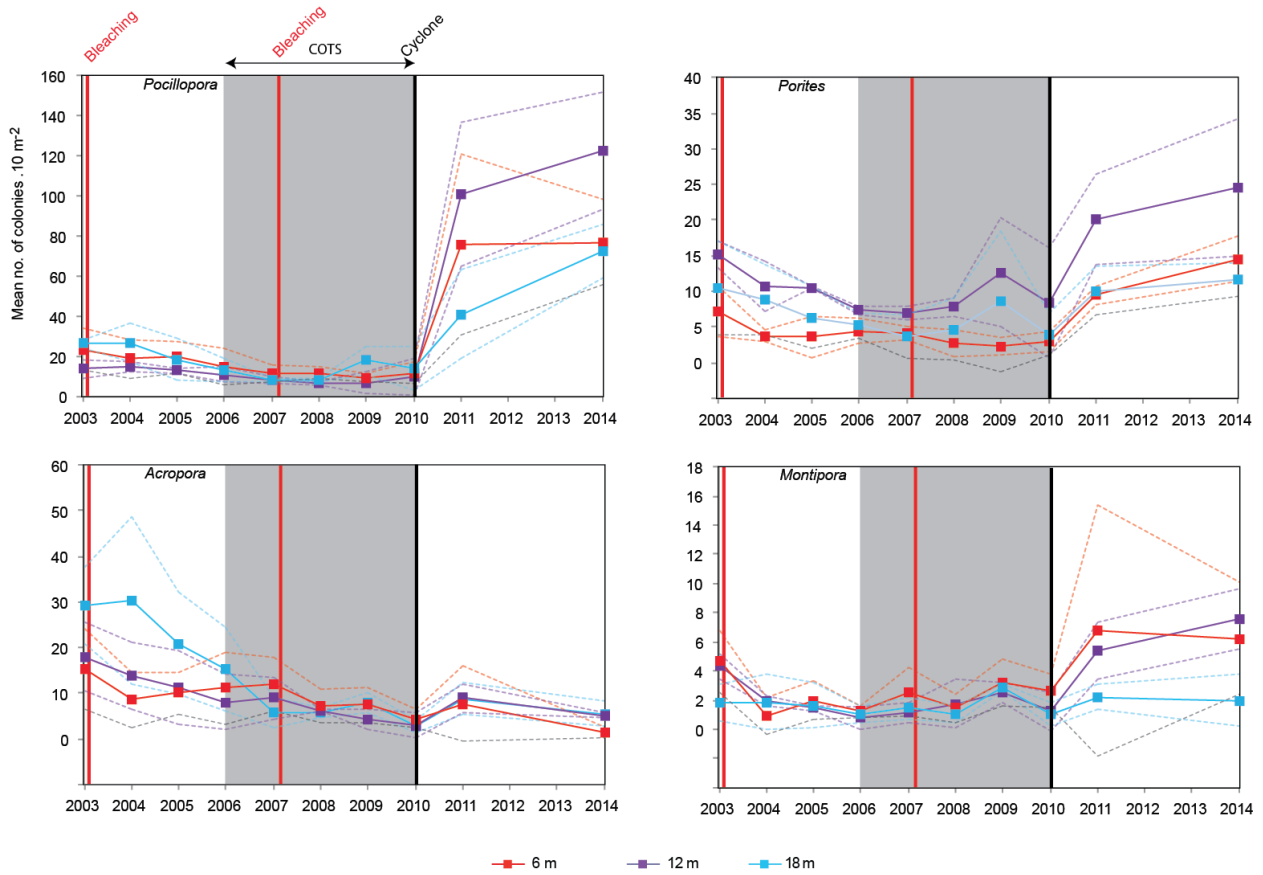

**Figure S9. Temporal dynamics in juvenile coral abundance of the four dominant genera at the three depths (all three locations pooled for each depth) impacted by the four disturbances between 2003 and 2014. Dotted lines represent standard deviation.**

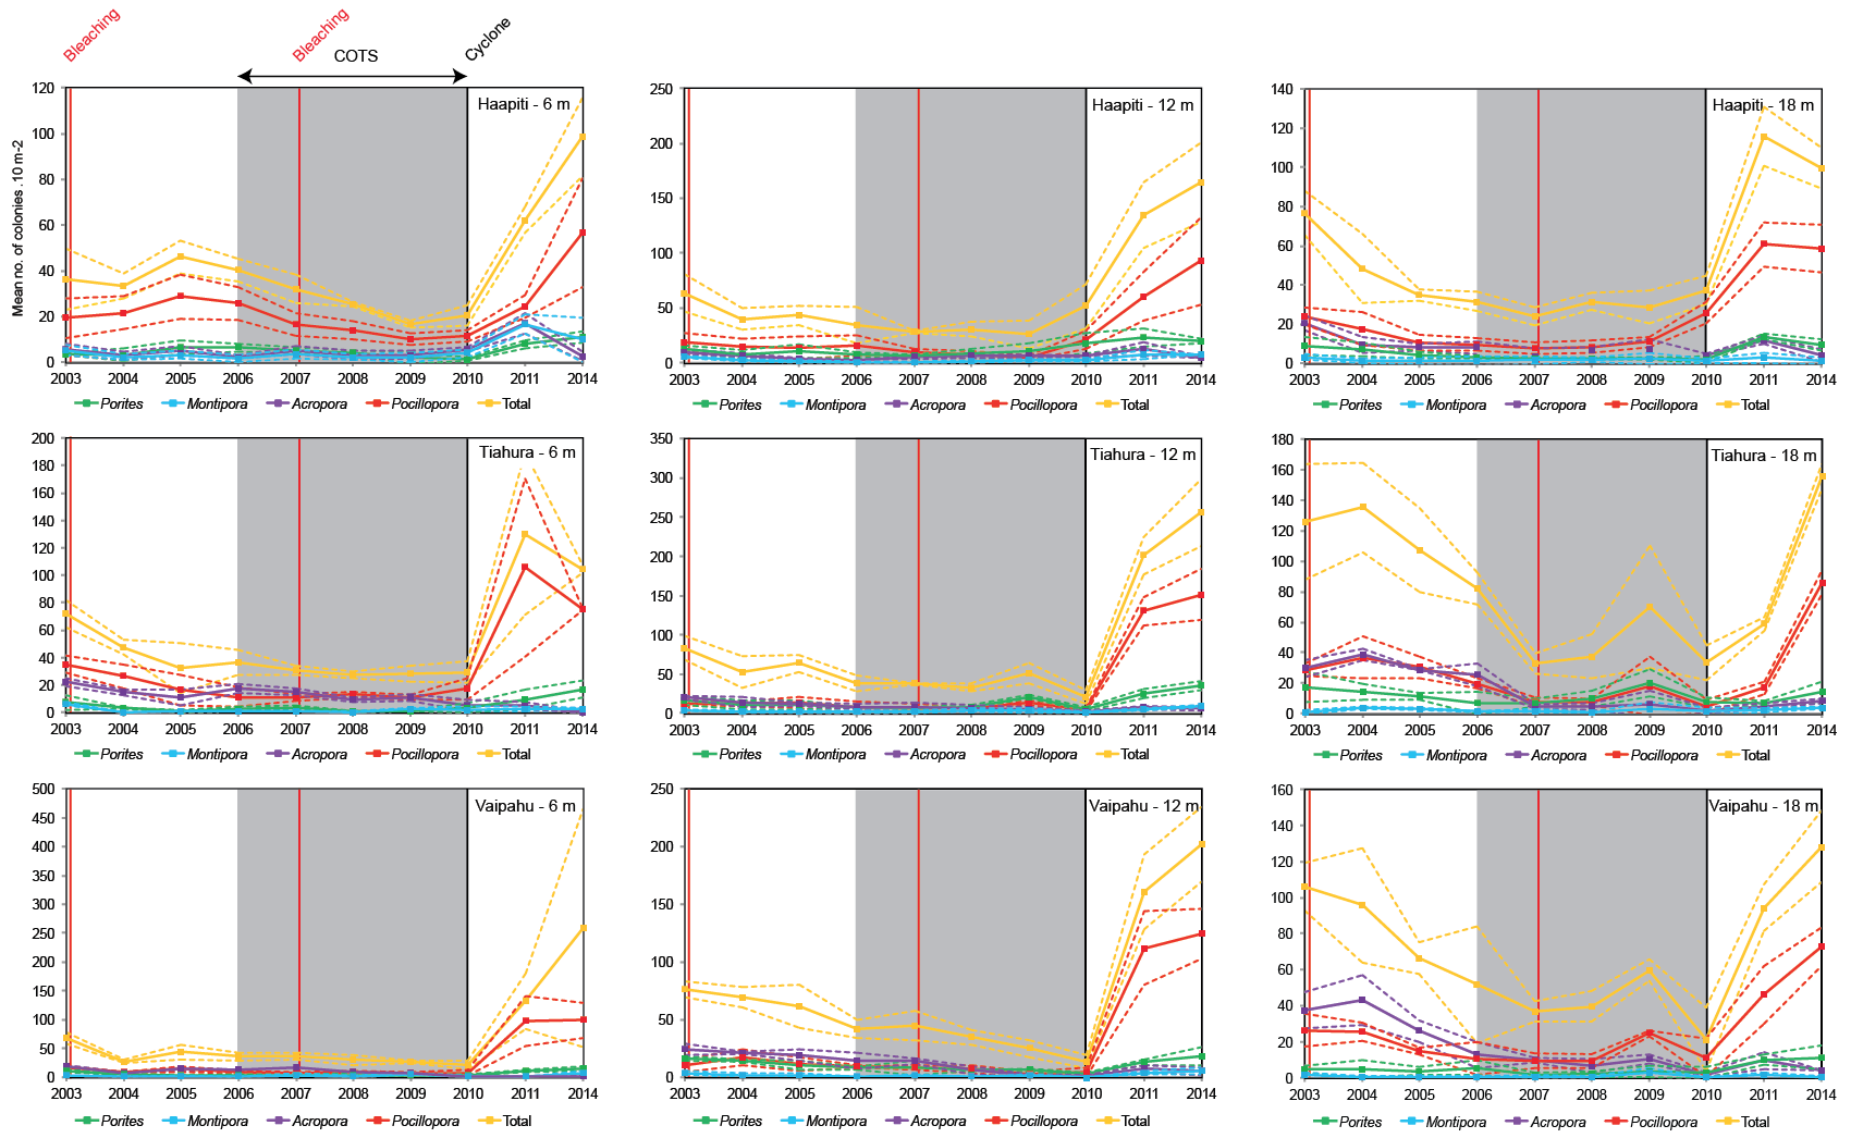

**Figure S10. Temporal dynamics in juvenile coral abundance of the four dominant genera at the nine stations impacted by the four disturbances between 2003 and 2014. Dotted lines represent standard deviation.**

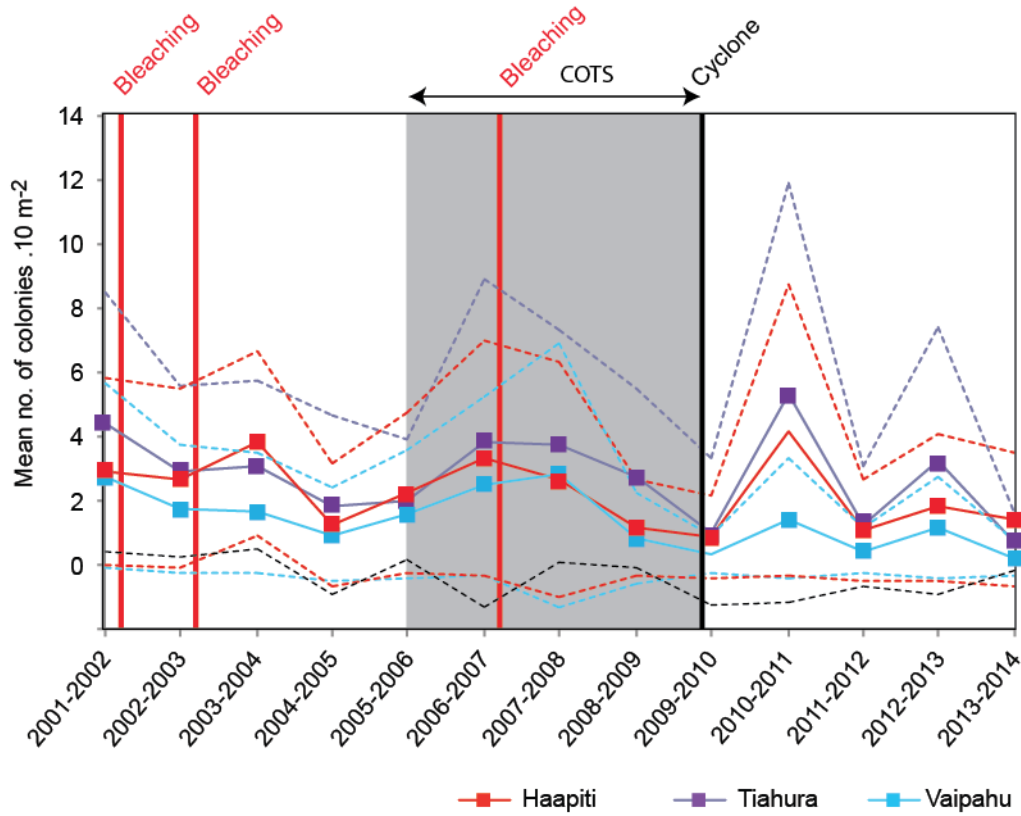

**Figure S11. Temporal dynamics in coral recruit abundance at the three locations (all three depths pooled at each location) impacted by the four disturbances between Sept. 2001 – March 2002 and Sept. 2013 – March 2014. Dotted lines represent standard deviation.**

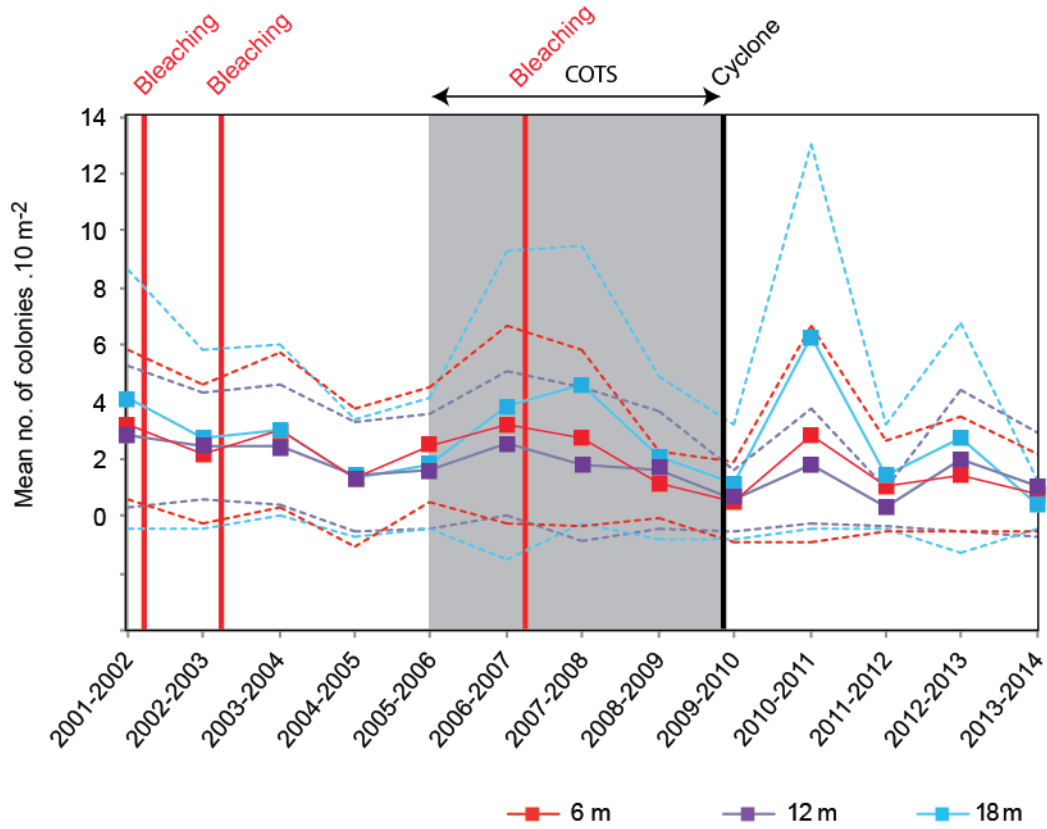

**Figure S12. Temporal dynamics in coral recruit abundance at the three depths (all three locations pooled for each depth) impacted by the four disturbances between Sept. 2001 – March 2002 and Sept. 2013 – March 2014. Dotted lines represent standard deviation.**

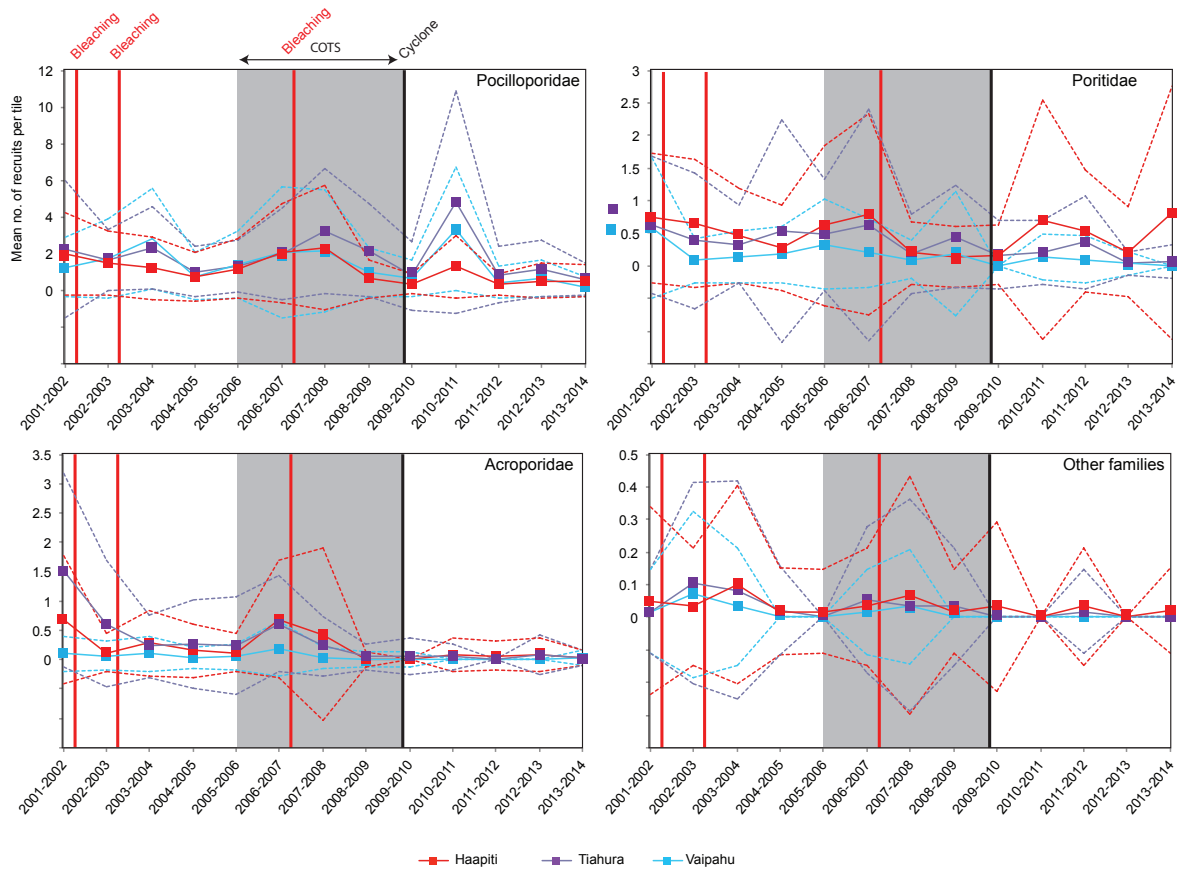

**Figure S13. Temporal dynamics in the abundance of the four major categories of coral recruits at the three locations (all three depths pooled at each location) impacted by the four disturbances between Sept. 2001 – March 2002 and Sept. 2013 – March 2014. Dotted lines represent standard deviation.**

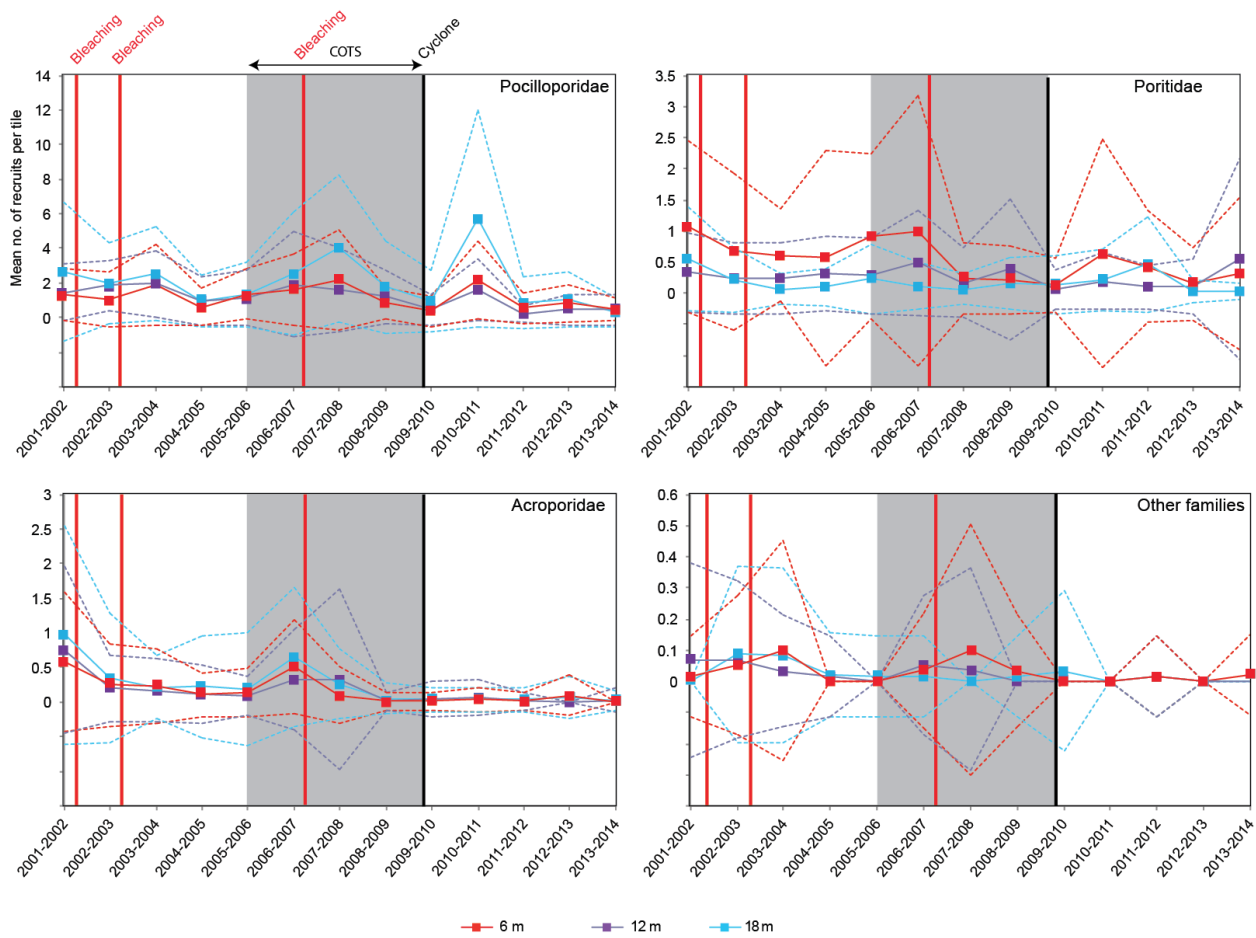

**Figure S14. Temporal dynamics in the abundance of the four major categories of coral recruits at the three depths (all three locations pooled for each depth) impacted by the four disturbances between Sept. 2001 – March 2002 and Sept. 2013 – March 2014. Dotted lines represent standard deviation.**

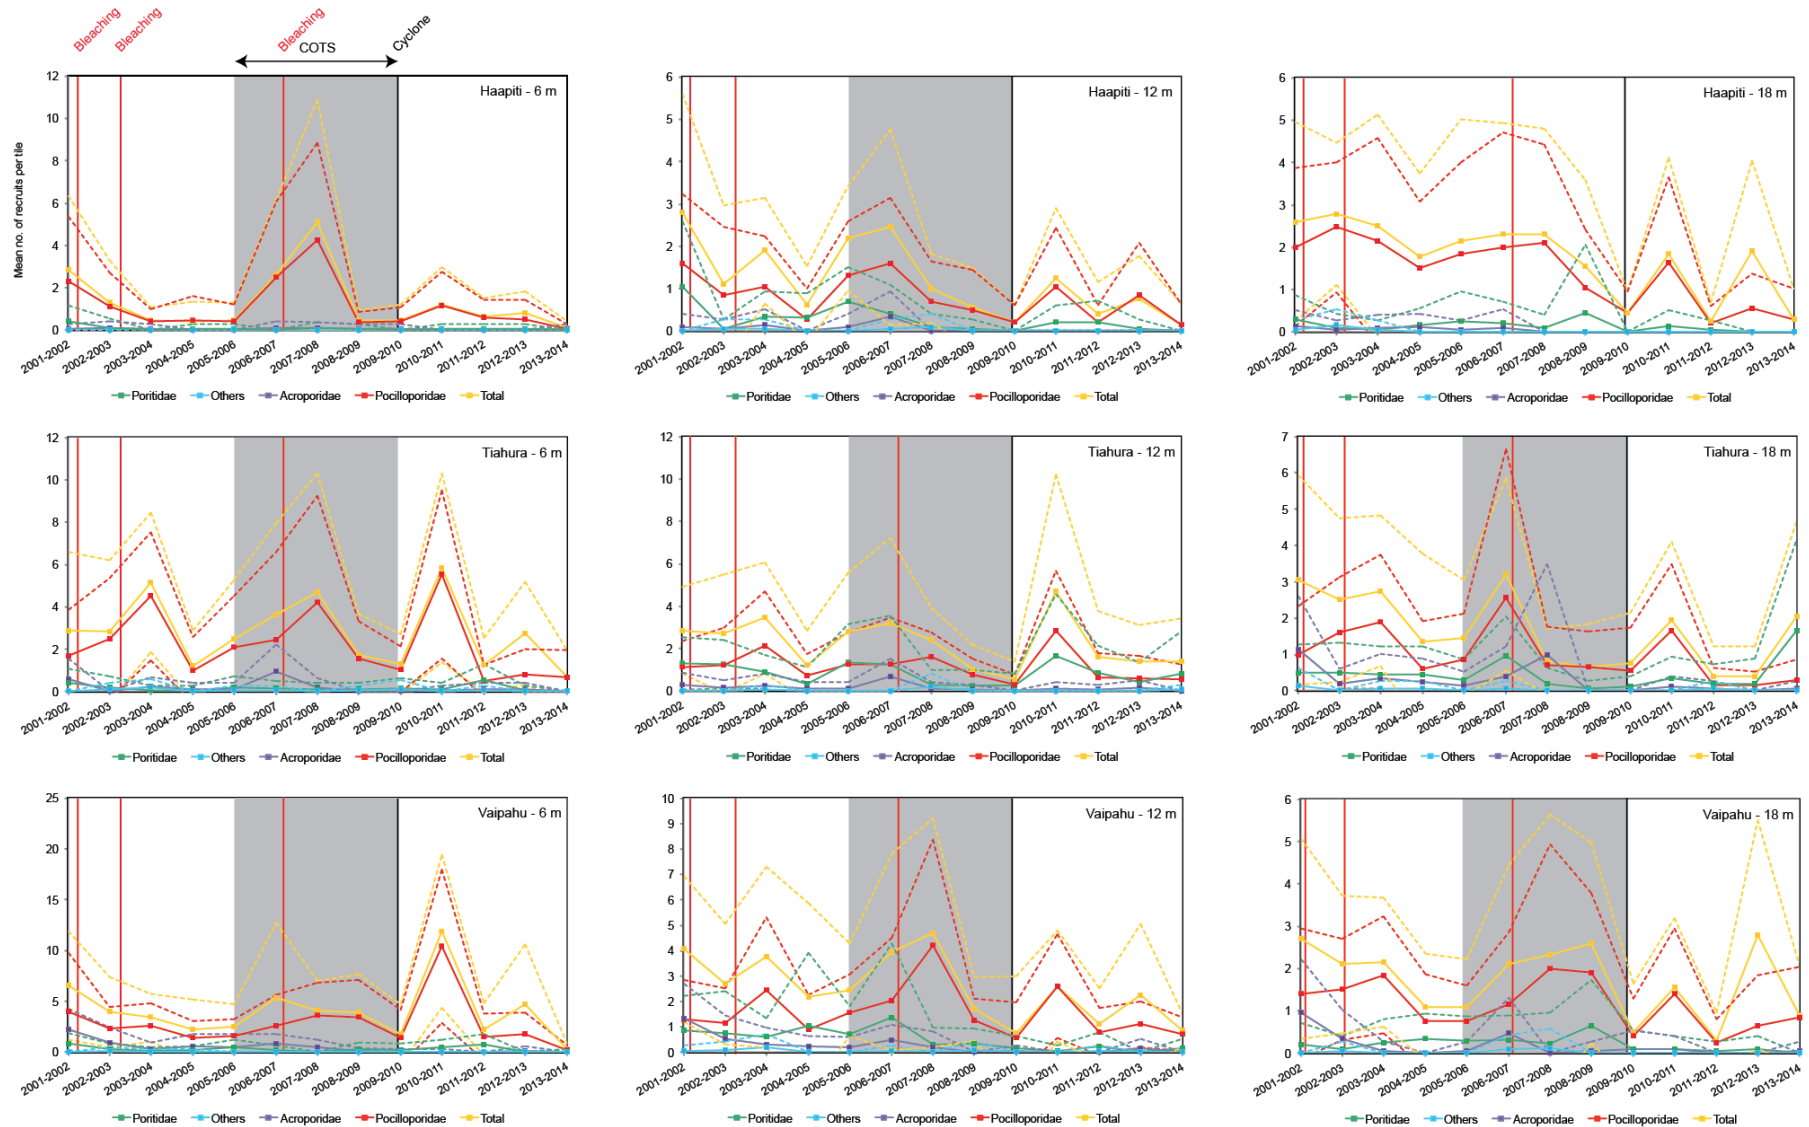

**Figure S15. Temporal dynamics in the abundance of the four major categories of coral recruits at the nine stations impacted by the four disturbances between Sept. 2001 – March 2002 and Sept. 2013 – March 2014. Dotted lines represent standard deviation.**



**Table S1. Differences between pairs of years for coral cover (all 18 genera pooled).** Significant differences are indicated in red (Wilcoxon tests, p-values < 5%). The interannual variability in cover among years was significant (Friedman test, p < 0.001).

|             | 1991  | 1992  | 1993  | 1994  | 1995  | 1996  | 1997  | 1998  | 1999  | 2000  | 2001  | 2002  | 2003  | 2004  | 2005  | 2006  | 2007  | 2008  | 2009  | 2010  | 2011  | 2012  | 2013  |  |
|-------------|-------|-------|-------|-------|-------|-------|-------|-------|-------|-------|-------|-------|-------|-------|-------|-------|-------|-------|-------|-------|-------|-------|-------|--|
| <b>1992</b> | 0.057 |       |       |       |       |       |       |       |       |       |       |       |       |       |       |       |       |       |       |       |       |       |       |  |
| <b>1993</b> | 0.029 | 0.886 |       |       |       |       |       |       |       |       |       |       |       |       |       |       |       |       |       |       |       |       |       |  |
| <b>1994</b> | 0.029 | 0.686 | 0.486 |       |       |       |       |       |       |       |       |       |       |       |       |       |       |       |       |       |       |       |       |  |
| <b>1995</b> | 0.029 | 0.686 | 0.343 | 0.661 |       |       |       |       |       |       |       |       |       |       |       |       |       |       |       |       |       |       |       |  |
| <b>1996</b> | 0.029 | 0.663 | 0.309 | 0.468 | 0.663 |       |       |       |       |       |       |       |       |       |       |       |       |       |       |       |       |       |       |  |
| <b>1997</b> | 0.081 | 0.200 | 0.029 | 0.057 | 0.146 | 0.144 |       |       |       |       |       |       |       |       |       |       |       |       |       |       |       |       |       |  |
| <b>1998</b> | 0.200 | 0.114 | 0.029 | 0.042 | 0.108 | 0.110 | 0.561 |       |       |       |       |       |       |       |       |       |       |       |       |       |       |       |       |  |
| <b>1999</b> | 0.191 | 0.110 | 0.029 | 0.055 | 0.183 | 0.108 | 0.663 | 0.882 |       |       |       |       |       |       |       |       |       |       |       |       |       |       |       |  |
| <b>2000</b> | 0.309 | 0.191 | 0.029 | 0.029 | 0.029 | 0.028 | 0.191 | 1.000 | 0.884 |       |       |       |       |       |       |       |       |       |       |       |       |       |       |  |
| <b>2001</b> | 0.770 | 0.041 | 0.029 | 0.029 | 0.029 | 0.028 | 0.059 | 0.191 | 0.297 | 0.058 |       |       |       |       |       |       |       |       |       |       |       |       |       |  |
| <b>2002</b> | 0.663 | 0.029 | 0.029 | 0.029 | 0.029 | 0.028 | 0.029 | 0.663 | 0.557 | 0.108 | 0.661 |       |       |       |       |       |       |       |       |       |       |       |       |  |
| <b>2003</b> | 0.200 | 0.057 | 0.029 | 0.029 | 0.029 | 0.029 | 0.114 | 1.000 | 0.663 | 0.559 | 0.191 | 0.309 |       |       |       |       |       |       |       |       |       |       |       |  |
| <b>2004</b> | 0.886 | 0.029 | 0.029 | 0.029 | 0.029 | 0.029 | 0.029 | 0.561 | 0.381 | 0.110 | 0.885 | 1.000 | 0.465 |       |       |       |       |       |       |       |       |       |       |  |
| <b>2005</b> | 0.657 | 0.041 | 0.029 | 0.029 | 0.029 | 0.028 | 0.059 | 0.309 | 0.378 | 0.058 | 0.760 | 1.000 | 0.191 | 0.885 |       |       |       |       |       |       |       |       |       |  |
| <b>2006</b> | 0.343 | 0.029 | 0.029 | 0.029 | 0.029 | 0.029 | 0.042 | 1.000 | 0.663 | 0.144 | 0.309 | 0.309 | 1.000 | 0.465 | 0.309 |       |       |       |       |       |       |       |       |  |
| <b>2007</b> | 0.029 | 1.000 | 1.000 | 0.110 | 0.041 | 0.028 | 0.029 | 0.029 | 0.028 | 0.028 | 0.028 | 0.028 | 0.029 | 0.029 | 0.028 | 0.029 |       |       |       |       |       |       |       |  |
| <b>2008</b> | 0.029 | 0.029 | 0.029 | 0.029 | 0.029 | 0.029 | 0.029 | 0.029 | 0.029 | 0.029 | 0.029 | 0.029 | 0.029 | 0.029 | 0.029 | 0.029 | 0.029 |       |       |       |       |       |       |  |
| <b>2009</b> | 0.029 | 0.029 | 0.029 | 0.029 | 0.029 | 0.028 | 0.029 | 0.029 | 0.028 | 0.028 | 0.028 | 0.028 | 0.029 | 0.029 | 0.028 | 0.029 | 0.028 | 0.029 |       |       |       |       |       |  |
| <b>2010</b> | 0.028 | 0.028 | 0.028 | 0.028 | 0.028 | 0.027 | 0.028 | 0.028 | 0.027 | 0.027 | 0.027 | 0.027 | 0.028 | 0.028 | 0.027 | 0.028 | 0.027 | 0.028 | 0.027 | 0.028 | 0.089 |       |       |  |
| <b>2011</b> | 0.027 | 0.027 | 0.027 | 0.027 | 0.027 | 0.026 | 0.027 | 0.027 | 0.026 | 0.026 | 0.026 | 0.026 | 0.027 | 0.027 | 0.026 | 0.027 | 0.026 | 0.027 | 0.026 | 0.027 | 0.137 | 0.608 |       |  |
| <b>2012</b> | 0.029 | 0.029 | 0.029 | 0.029 | 0.029 | 0.029 | 0.029 | 0.029 | 0.029 | 0.029 | 0.029 | 0.029 | 0.029 | 0.029 | 0.029 | 0.029 | 0.029 | 0.146 | 0.653 | 0.053 | 0.065 |       |       |  |
| <b>2013</b> | 0.029 | 0.029 | 0.029 | 0.029 | 0.029 | 0.028 | 0.029 | 0.029 | 0.028 | 0.028 | 0.028 | 0.028 | 0.029 | 0.029 | 0.028 | 0.029 | 0.028 | 0.770 | 0.297 | 0.052 | 0.063 | 0.381 |       |  |
| <b>2014</b> | 0.029 | 0.686 | 0.686 | 0.057 | 0.057 | 0.029 | 0.029 | 0.029 | 0.029 | 0.029 | 0.029 | 0.029 | 0.029 | 0.029 | 0.029 | 0.029 | 0.309 | 0.057 | 0.029 | 0.028 | 0.027 | 0.029 | 0.055 |  |

**Table S2. Differences between pairs of years for cover of turf algae.** Significant differences are indicated in red (Wilcoxon tests, p-values < 5%).

The interannual variability in cover among years was significant (Friedman test, p < 0.001).

|             | 1991 | 1992  | 1993  | 1994  | 1995  | 1996  | 1997  | 1998  | 1999  | 2000  | 2001  | 2002  | 2003  | 2004  | 2005  | 2006  | 2007  | 2008  | 2009  | 2010  | 2011  | 2012  | 2013  |       |       |       |       |       |       |       |       |
|-------------|------|-------|-------|-------|-------|-------|-------|-------|-------|-------|-------|-------|-------|-------|-------|-------|-------|-------|-------|-------|-------|-------|-------|-------|-------|-------|-------|-------|-------|-------|-------|
| <b>1992</b> |      | 0.029 |       |       |       |       |       |       |       |       |       |       |       |       |       |       |       |       |       |       |       |       |       |       |       |       |       |       |       |       |       |
| <b>1993</b> |      | 0.029 | 0.080 |       |       |       |       |       |       |       |       |       |       |       |       |       |       |       |       |       |       |       |       |       |       |       |       |       |       |       |       |
| <b>1994</b> |      | 0.029 | 0.028 | 0.029 |       |       |       |       |       |       |       |       |       |       |       |       |       |       |       |       |       |       |       |       |       |       |       |       |       |       |       |
| <b>1995</b> |      | 0.029 | 0.465 | 0.770 | 0.028 |       |       |       |       |       |       |       |       |       |       |       |       |       |       |       |       |       |       |       |       |       |       |       |       |       |       |
| <b>1996</b> |      | 0.029 | 0.080 | 0.661 | 0.104 | 0.381 |       |       |       |       |       |       |       |       |       |       |       |       |       |       |       |       |       |       |       |       |       |       |       |       |       |
| <b>1997</b> |      | 0.029 | 0.770 | 0.306 | 0.029 | 0.663 | 0.245 |       |       |       |       |       |       |       |       |       |       |       |       |       |       |       |       |       |       |       |       |       |       |       |       |
| <b>1998</b> |      | 0.029 | 0.055 | 0.029 | 0.029 | 0.309 | 0.029 | 0.245 |       |       |       |       |       |       |       |       |       |       |       |       |       |       |       |       |       |       |       |       |       |       |       |
| <b>1999</b> |      | 0.029 | 0.770 | 0.146 | 0.029 | 0.381 | 0.114 | 0.772 | 0.772 |       |       |       |       |       |       |       |       |       |       |       |       |       |       |       |       |       |       |       |       |       |       |
| <b>2000</b> |      | 0.343 | 0.029 | 0.029 | 0.029 | 0.110 | 0.029 | 0.114 | 0.245 | 0.245 |       |       |       |       |       |       |       |       |       |       |       |       |       |       |       |       |       |       |       |       |       |
| <b>2001</b> |      | 0.146 | 0.144 | 0.029 | 0.029 | 0.110 | 0.029 | 0.146 | 0.384 | 0.245 | 0.886 |       |       |       |       |       |       |       |       |       |       |       |       |       |       |       |       |       |       |       |       |
| <b>2002</b> |      | 0.146 | 0.029 | 0.029 | 0.029 | 0.110 | 0.029 | 0.081 | 0.146 | 0.200 | 1.000 | 0.884 |       |       |       |       |       |       |       |       |       |       |       |       |       |       |       |       |       |       |       |
| <b>2003</b> |      | 0.183 | 0.028 | 0.029 | 0.028 | 0.028 | 0.029 | 0.029 | 0.029 | 0.029 | 1.000 | 0.663 | 0.770 |       |       |       |       |       |       |       |       |       |       |       |       |       |       |       |       |       |       |
| <b>2004</b> |      | 0.104 | 0.028 | 0.029 | 0.028 | 0.058 | 0.029 | 0.059 | 0.110 | 0.110 | 0.770 | 1.000 | 1.000 | 0.442 |       |       |       |       |       |       |       |       |       |       |       |       |       |       |       |       |       |
| <b>2005</b> |      | 0.663 | 0.028 | 0.029 | 0.028 | 0.028 | 0.029 | 0.029 | 0.029 | 0.029 | 0.663 | 0.191 | 0.191 | 0.189 | 0.078 |       |       |       |       |       |       |       |       |       |       |       |       |       |       |       |       |
| <b>2006</b> |      | 0.561 | 0.029 | 0.029 | 0.029 | 0.029 | 0.029 | 0.029 | 0.029 | 0.029 | 0.686 | 0.189 | 0.245 | 0.191 | 0.059 | 1.000 |       |       |       |       |       |       |       |       |       |       |       |       |       |       |       |
| <b>2007</b> |      | 0.029 | 0.183 | 0.561 | 0.243 | 0.468 | 0.886 | 0.245 | 0.042 | 0.146 | 0.029 | 0.057 | 0.029 | 0.029 | 0.029 | 0.029 | 0.029 | 0.029 | 0.029 | 0.029 | 0.029 | 0.029 | 0.029 | 0.029 | 0.029 |       |       |       |       |       |       |
| <b>2008</b> |      | 0.029 | 0.029 | 0.029 | 0.309 | 0.029 | 0.081 | 0.029 | 0.029 | 0.029 | 0.029 | 0.029 | 0.029 | 0.029 | 0.029 | 0.029 | 0.029 | 0.029 | 0.029 | 0.029 | 0.029 | 0.029 | 0.029 | 0.029 | 0.114 |       |       |       |       |       |       |
| <b>2009</b> |      | 0.029 | 0.059 | 0.245 | 1.000 | 0.110 | 0.486 | 0.114 | 0.029 | 0.057 | 0.029 | 0.029 | 0.029 | 0.029 | 0.029 | 0.029 | 0.029 | 0.029 | 0.029 | 0.029 | 0.029 | 0.029 | 0.029 | 0.029 | 0.486 | 0.306 |       |       |       |       |       |
| <b>2010</b> |      | 0.029 | 0.029 | 0.081 | 0.885 | 0.110 | 0.245 | 0.042 | 0.029 | 0.042 | 0.029 | 0.029 | 0.029 | 0.029 | 0.029 | 0.029 | 0.029 | 0.029 | 0.029 | 0.029 | 0.029 | 0.029 | 0.029 | 0.029 | 0.465 | 0.384 | 0.886 |       |       |       |       |
| <b>2011</b> |      | 0.029 | 0.028 | 0.059 | 0.306 | 0.028 | 0.110 | 0.029 | 0.029 | 0.029 | 0.029 | 0.029 | 0.029 | 0.028 | 0.028 | 0.028 | 0.029 | 0.029 | 0.029 | 0.029 | 0.029 | 0.029 | 0.029 | 0.029 | 0.110 | 0.243 | 1.000 | 0.663 |       |       |       |
| <b>2012</b> |      | 0.029 | 0.028 | 0.110 | 1.000 | 0.091 | 0.309 | 0.029 | 0.029 | 0.029 | 0.029 | 0.029 | 0.029 | 0.028 | 0.028 | 0.028 | 0.029 | 0.029 | 0.029 | 0.029 | 0.029 | 0.029 | 0.029 | 0.029 | 0.309 | 0.663 | 0.663 | 0.663 | 1.000 |       |       |
| <b>2013</b> |      | 0.029 | 0.309 | 0.686 | 0.059 | 0.301 | 0.886 | 0.200 | 0.081 | 0.114 | 0.029 | 0.057 | 0.029 | 0.029 | 0.029 | 0.029 | 0.029 | 0.029 | 0.029 | 0.029 | 0.029 | 0.029 | 0.029 | 0.029 | 0.886 | 0.057 | 0.343 | 0.343 | 0.080 | 0.460 |       |
| <b>2014</b> |      | 0.029 | 0.080 | 0.343 | 0.381 | 0.191 | 0.686 | 0.114 | 0.029 | 0.081 | 0.029 | 0.042 | 0.029 | 0.029 | 0.029 | 0.029 | 0.029 | 0.029 | 0.029 | 0.029 | 0.029 | 0.029 | 0.029 | 0.029 | 0.772 | 0.200 | 0.686 | 0.686 | 0.191 | 0.663 | 0.384 |

**Table S3. Differences between pairs of years for cover of macroalgae.** Significant differences are indicated in red (Wilcoxon tests, p-values < 5%).

The interannual variability in cover among years was significant (Friedman test, p < 0.001).

|             | 1991         | 1992         | 1993         | 1994         | 1995         | 1996         | 1997         | 1998         | 1999         | 2000         | 2001         | 2002         | 2003         | 2004         | 2005         | 2006         | 2007         | 2008         | 2009  | 2010         | 2011         | 2012         | 2013  |       |
|-------------|--------------|--------------|--------------|--------------|--------------|--------------|--------------|--------------|--------------|--------------|--------------|--------------|--------------|--------------|--------------|--------------|--------------|--------------|-------|--------------|--------------|--------------|-------|-------|
| <b>1992</b> | 0.453        |              |              |              |              |              |              |              |              |              |              |              |              |              |              |              |              |              |       |              |              |              |       |       |
| <b>1993</b> | 1.000        | 0.453        |              |              |              |              |              |              |              |              |              |              |              |              |              |              |              |              |       |              |              |              |       |       |
| <b>1994</b> | 1.000        | 0.453        | 1.000        |              |              |              |              |              |              |              |              |              |              |              |              |              |              |              |       |              |              |              |       |       |
| <b>1995</b> | 0.620        | 0.186        | 0.505        | 0.620        |              |              |              |              |              |              |              |              |              |              |              |              |              |              |       |              |              |              |       |       |
| <b>1996</b> | 1.000        | 0.453        | 1.000        | 1.000        | 0.620        |              |              |              |              |              |              |              |              |              |              |              |              |              |       |              |              |              |       |       |
| <b>1997</b> | 0.453        | -----        | 0.453        | 0.453        | 0.186        | 0.453        |              |              |              |              |              |              |              |              |              |              |              |              |       |              |              |              |       |       |
| <b>1998</b> | 0.453        | -----        | 0.453        | 0.453        | 0.186        | 0.453        | -----        |              |              |              |              |              |              |              |              |              |              |              |       |              |              |              |       |       |
| <b>1999</b> | 0.453        | -----        | 0.453        | 0.453        | 0.186        | 0.453        | -----        | -----        |              |              |              |              |              |              |              |              |              |              |       |              |              |              |       |       |
| <b>2000</b> | 0.453        | -----        | 0.453        | 0.453        | 0.186        | 0.453        | -----        | -----        | -----        |              |              |              |              |              |              |              |              |              |       |              |              |              |       |       |
| <b>2001</b> | 0.453        | -----        | 0.453        | 0.453        | 0.186        | 0.453        | -----        | -----        | -----        | -----        |              |              |              |              |              |              |              |              |       |              |              |              |       |       |
| <b>2002</b> | 0.739        | 0.186        | 0.505        | 0.739        | 1.000        | 0.739        | 0.186        | 0.186        | 0.186        | 0.186        | 0.186        | 0.186        |              |              |              |              |              |              |       |              |              |              |       |       |
| <b>2003</b> | 1.000        | 0.453        | 1.000        | 1.000        | 0.620        | 1.000        | 0.453        | 0.453        | 0.453        | 0.453        | 0.453        | 0.453        | 0.739        |              |              |              |              |              |       |              |              |              |       |       |
| <b>2004</b> | 0.278        | 0.069        | 0.163        | 0.278        | 0.766        | 0.278        | 0.069        | 0.069        | 0.069        | 0.069        | 0.069        | 0.069        | 0.454        | 0.278        |              |              |              |              |       |              |              |              |       |       |
| <b>2005</b> | 0.868        | 0.181        | 0.608        | 0.868        | 0.874        | 0.868        | 0.181        | 0.181        | 0.181        | 0.181        | 0.181        | 0.181        | 0.874        | 0.868        | 0.288        |              |              |              |       |              |              |              |       |       |
| <b>2006</b> | 0.739        | 0.186        | 0.505        | 0.739        | 1.000        | 0.739        | 0.186        | 0.186        | 0.186        | 0.186        | 0.186        | 0.186        | 1.000        | 0.739        | 0.454        | 0.874        |              |              |       |              |              |              |       |       |
| <b>2007</b> | 0.868        | 0.181        | 0.608        | 0.868        | 0.874        | 0.868        | 0.181        | 0.181        | 0.181        | 0.181        | 0.181        | 0.181        | 0.874        | 0.868        | 0.288        | 1.000        | 0.874        |              |       |              |              |              |       |       |
| <b>2008</b> | 0.074        | <b>0.021</b> | <b>0.037</b> | 0.074        | 0.186        | 0.074        | <b>0.021</b> | <b>0.021</b> | <b>0.021</b> | <b>0.021</b> | <b>0.021</b> | <b>0.021</b> | 0.106        | 0.074        | 0.306        | 0.053        | 0.106        | 0.053        |       |              |              |              |       |       |
| <b>2009</b> | 0.620        | 0.186        | 0.505        | 0.620        | 1.000        | 0.620        | 0.186        | 0.186        | 0.186        | 0.186        | 0.186        | 0.186        | 1.000        | 0.620        | 0.653        | 0.874        | 1.000        | 0.874        | 0.144 |              |              |              |       |       |
| <b>2010</b> | 0.453        | -----        | 0.453        | 0.453        | 0.186        | 0.453        | -----        | -----        | -----        | -----        | -----        | -----        | 0.186        | 0.453        | 0.069        | 0.181        | 0.186        | 0.181        | 0.021 | 0.186        |              |              |       |       |
| <b>2011</b> | <b>0.036</b> | <b>0.020</b> | <b>0.026</b> | <b>0.036</b> | 0.240        | <b>0.036</b> | <b>0.020</b> | <b>0.020</b> | <b>0.020</b> | <b>0.020</b> | <b>0.020</b> | <b>0.020</b> | <b>0.040</b> | <b>0.036</b> | 0.137        | <b>0.027</b> | <b>0.040</b> | <b>0.027</b> | 1.000 | 0.102        | <b>0.020</b> |              |       |       |
| <b>2012</b> | 0.206        | 0.067        | 0.122        | 0.206        | 0.457        | 0.206        | 0.067        | 0.067        | 0.067        | 0.067        | 0.067        | 0.067        | 0.288        | 0.206        | 0.766        | 0.178        | 0.288        | 0.178        | 0.657 | 0.457        | 0.067        | 0.457        |       |       |
| <b>2013</b> | <b>0.027</b> | <b>0.021</b> | <b>0.027</b> | <b>0.027</b> | <b>0.041</b> | <b>0.027</b> | <b>0.021</b> | <b>0.021</b> | <b>0.021</b> | <b>0.021</b> | <b>0.021</b> | <b>0.021</b> | <b>0.029</b> | <b>0.027</b> | <b>0.029</b> | <b>0.028</b> | <b>0.029</b> | <b>0.028</b> | 0.108 | <b>0.029</b> | <b>0.021</b> | <b>0.041</b> | 0.059 |       |
| <b>2014</b> | <b>0.026</b> | <b>0.020</b> | <b>0.026</b> | <b>0.026</b> | 0.058        | <b>0.026</b> | <b>0.020</b> | <b>0.020</b> | <b>0.020</b> | <b>0.020</b> | <b>0.020</b> | <b>0.020</b> | <b>0.028</b> | <b>0.026</b> | <b>0.041</b> | <b>0.027</b> | <b>0.028</b> | <b>0.027</b> | 0.309 | <b>0.040</b> | <b>0.020</b> | 0.102        | 0.102 | 0.381 |

**Table S4. Deviance table of the generalized linear mixed-effect models (GLMMs) best describing the dynamics of coral stages and taxa.** Four candidate models with different levels of complexity were tested, and the best model formulation was identified using Akaike Information Criterion (AIC) and Chi<sup>2</sup> deviance tests.

| Life stage     | Taxon              | Best model     | Covariable      | p-value |
|----------------|--------------------|----------------|-----------------|---------|
| Adults         | <i>Pocillopora</i> | Model 3        | Time            | 0.025   |
|                |                    |                | Depth           | < 0.001 |
|                |                    |                | Time × Depth    | 0.002   |
|                | <i>Porites</i>     | Model 3        | Time            | 0.002   |
|                |                    |                | Depth           | < 0.001 |
|                |                    |                | Time × Depth    | 0.027   |
|                | <i>Acropora</i>    | Model 2        | Time            | 0.002   |
|                |                    |                | Location        | 0.002   |
|                |                    |                | Time × Location | 0.065   |
|                | <i>Montipora</i>   | Model 3        | Time            | 0.014   |
|                |                    |                | Depth           | < 0.001 |
|                |                    |                | Time × Depth    | 0.731   |
|                | All 19 genera      | Model 3        | Time            | 0.041   |
|                |                    |                | Depth           | 0.145   |
|                |                    |                | Time × Depth    | 0.053   |
| Juveniles      | <i>Pocillopora</i> | Model 1        | Time            | < 0.001 |
|                | <i>Porites</i>     | Model 3        | Time            | 0.020   |
|                |                    |                | Depth           | < 0.001 |
|                |                    |                | Time × Depth    | 0.328   |
|                | <i>Acropora</i>    | Model 2        | Time            | 0.823   |
|                |                    |                | Location        | 0.001   |
|                |                    |                | Time × Location | < 0.001 |
|                | <i>Montipora</i>   | Model 1        | Time            | 0.001   |
|                | All 19 genera      | Model 3        | Time            | 0.002   |
|                |                    |                | Depth           | 0.0292  |
|                |                    |                | Time × Depth    | 0.098   |
|                | Recruits           | Pocilloporidae | Model 0         | -       |
| Poritidae      |                    | Model 0        | -               | -       |
| Acroporidae    |                    | Model 1        | Time            | 0.001   |
| Other families |                    | Model 0        | -               | -       |
| All taxa       |                    | Model 0        | -               | -       |

**Table S5. Parameter estimates of the generalized linear mixed-effect models (GLMMs) best describing the dynamics of coral stages and taxa.** Four candidate models with different levels of complexity were tested, and the best model formulation was identified using Akaike Information Criterion (AIC) and Chi<sup>2</sup> deviance tests. SE indicates standard error.

| Life stage     | Taxon              | Best model     | Level           | Intercept     | SE intercept | Slope  | SE slope |
|----------------|--------------------|----------------|-----------------|---------------|--------------|--------|----------|
| Adults         | <i>Pocillopora</i> | Model 3        | Depth = 6m      | 4.269         | 0.117        | -0.115 | 0.039    |
|                |                    |                | Depth = 12m     | 3.625         | 0.182        | -0.234 | 0.061    |
|                |                    |                | Depth = 18m     | 3.087         | 0.204        | -0.298 | 0.068    |
|                | <i>Porites</i>     | Model 3        | Depth = 6m      | 3.108         | 0.080        | -0.081 | 0.028    |
|                |                    |                | Depth = 12m     | 3.527         | 0.115        | -0.127 | 0.038    |
|                |                    |                | Depth = 18m     | 2.751         | 0.121        | -0.148 | 0.040    |
|                | <i>Acropora</i>    | Model 2        | Site = Haapiti  | 2.125         | 0.209        | -0.214 | 0.071    |
|                |                    |                | Site = Tiahura  | 2.754         | 0.293        | -0.369 | 0.100    |
|                |                    |                | Site = Vaipahu  | 2.868         | 0.293        | -0.389 | 0.102    |
|                | <i>Montipora</i>   | Model 3        | Depth = 6m      | 2.733         | 0.189        | -0.116 | 0.046    |
|                |                    |                | Depth = 12m     | 2.655         | 0.195        | -0.069 | 0.060    |
|                |                    |                | Depth = 18m     | 1.456         | 0.209        | -0.109 | 0.067    |
|                | All 19 genera      | Model 3        | Depth = 6m      | 4.968         | 0.128        | -0.071 | 0.038    |
|                |                    |                | Depth = 12m     | 4.804         | 0.163        | -0.117 | 0.052    |
|                |                    |                | Depth = 18m     | 4.688         | 0.163        | -0.189 | 0.052    |
| Juveniles      | <i>Pocillopora</i> | Model 1        | all locations   | 3.173         | 0.082        | 0.153  | 0.027    |
|                | <i>Porites</i>     | Model 3        | Depth = 6m      | 1.669         | 0.148        | 0.088  | 0.036    |
|                |                    |                | Depth = 12m     | 2.498         | 0.198        | 0.062  | 0.047    |
|                |                    |                | Depth = 18m     | 1.954         | 0.200        | 0.019  | 0.049    |
|                | <i>Acropora</i>    | Model 2        | Site = Haapiti  | 1.883         | 0.118        | -0.01  | 0.034    |
|                |                    |                | Site = Tiahura  | 2.276         | 0.163        | -0.212 | 0.047    |
|                |                    |                | Site = Vaipahu  | 2.255         | 0.164        | -0.247 | 0.047    |
|                | <i>Montipora</i>   | Model 1        | all populations | 0.843         | 0.144        | 0.088  | 0.027    |
|                | All 19 genera      | Model 3        | Depth = 6m      | 3.932         | 0.124        | 0.100  | 0.032    |
|                |                    |                | Depth = 12m     | 4.214         | 0.152        | 0.109  | 0.044    |
|                |                    |                | Depth = 18m     | 4.225         | 0.151        | 0.003  | 0.045    |
|                | Recruits           | Pocilloporidae | Model 0         | all locations | 0.384        | 0.138  | -        |
| Poritidae      |                    | Model 0        | all locations   | -1.186        | 0.232        | -      | -        |
| Acroporidae    |                    | Model 1        | all locations   | -2.053        | 0.443        | -0.242 | 0.075    |
| Other families |                    | Model 0        | all locations   | -3.649        | 0.597        | -      | -        |
| All taxa       |                    | Model 0        | all locations   | 0.759         | 0.151        | -      | -        |

**Table S6. Overall (all stations pooled) decline and recovery trajectories of coral abundance during the study period.** Post-hoc tests were used to compare mean abundance values at the end of the study (2014) to initial values (2003). This analysis was not made for coral recruits as no significant temporal variability was detected.

| Coral stages/taxa |                    | Decline rate<br>(2003 to 2010) | Recovery rate<br>(2010 to 2014) | 2003 vs. 2014<br>(p-value) |
|-------------------|--------------------|--------------------------------|---------------------------------|----------------------------|
| Adults            | <i>Pocillopora</i> | 95%                            | 109%                            | 0.999                      |
|                   | <i>Porites</i>     | 82%                            | 50%                             | 0.145                      |
|                   | <i>Acropora</i>    | 99%                            | 14%                             | 0.098                      |
|                   | <i>Montipora</i>   | 92%                            | 70%                             | 0.985                      |
|                   | All 19 genera      | 85%                            | 57%                             | 0.932                      |
| Juveniles         | <i>Pocillopora</i> | 47%                            | 371%                            | < 0.001                    |
|                   | <i>Porites</i>     | 28%                            | 108%                            | 0.226                      |
|                   | <i>Acropora</i>    | 68%                            | 3%                              | 0.099                      |
|                   | <i>Montipora</i>   | 10%                            | 100%                            | 0.809                      |
|                   | All 19 genera      | 53%                            | 173%                            | < 0.001                    |

**Table S7. List of the coral genera recorded within transects established for percent cover estimates (% cover), and within belt-transects for juvenile and adult abundance surveys.**

| Genera                | % cover | Juveniles | Adults |
|-----------------------|---------|-----------|--------|
| <i>Acanthastrea</i>   | +       |           | +      |
| <i>Acropora</i>       | +       | +         | +      |
| <i>Astreopora</i>     | +       | +         | +      |
| <i>Cyphastrea</i>     | +       | +         | +      |
| <i>Favia</i>          | +       | +         | +      |
| <i>Fungia</i>         | +       | +         | +      |
| <i>Gardineroseris</i> | +       | +         | +      |
| <i>Herpolitha</i>     | +       | +         | +      |
| <i>Leptastrea</i>     | +       | +         | +      |
| <i>Leptoseris</i>     | +       | +         | +      |
| <i>Lopophyllia</i>    | +       | +         | +      |
| <i>Montastrea</i>     | +       | +         | +      |
| <i>Montipora</i>      | +       | +         | +      |
| <i>Pachyseris</i>     |         | +         | +      |
| <i>Pavona</i>         | +       | +         | +      |
| <i>Pocillopora</i>    | +       | +         | +      |
| <i>Porites</i>        | +       | +         | +      |
| <i>Psammocora</i>     | +       | +         | +      |
| <i>Sandalolitha</i>   | +       | +         | +      |
